# Supplementary material for: Nanocrystalline alumina-supported ceria–praseodymia solid solutions: structural characteristics and catalytic CO oxidation
Source: Royal Society of Chemistry journal article supplement (doi:10.1039/c6ra06679h), 2016-01-01

## Electronic Supplementary Information

### **Nanocrystalline alumina-supported ceria–praseodymia solid solutions: Structural characteristics and catalytic CO oxidation**

**Damma Devaiah,<sup>a,b</sup> Gode Thrimurthulu,<sup>a</sup> Panagiotis G. Smirniotis,<sup>b</sup> Benjaram M. Reddy<sup>a,\*</sup>**

*<sup>a</sup>Inorganic and Physical Chemistry Division, CSIR-Indian Institute of Chemical Technology, Uppal Road, Hyderabad – 500007, India*

*<sup>b</sup>Chemical Engineering Program, Biomedical, Chemical, and Environmental Engineering, University of Cincinnati, Cincinnati, OH 45221–0012, USA*

**Table S1.** The chemical composition of CP/A samples calcined at different temperatures

| Sample    | Nominal composition |      |      | Elemental composition from<br>ICP-OES analysis |      |      |
|-----------|---------------------|------|------|------------------------------------------------|------|------|
|           | Ce                  | Pr   | Al   | Ce                                             | Pr   | Al   |
| CP/A 773  | 0.80                | 0.20 | 1.00 | 0.79                                           | 0.21 | 0.99 |
| CP/A 873  | 0.80                | 0.20 | 1.00 | 0.79                                           | 0.21 | 0.99 |
| CP/A 973  | 0.80                | 0.20 | 1.00 | 0.78                                           | 0.22 | 0.99 |
| CP/A 1073 | 0.80                | 0.20 | 1.00 | 0.78                                           | 0.22 | 0.99 |

**Fig. S1.** Cycling test of CP/A 773 for CO oxidation

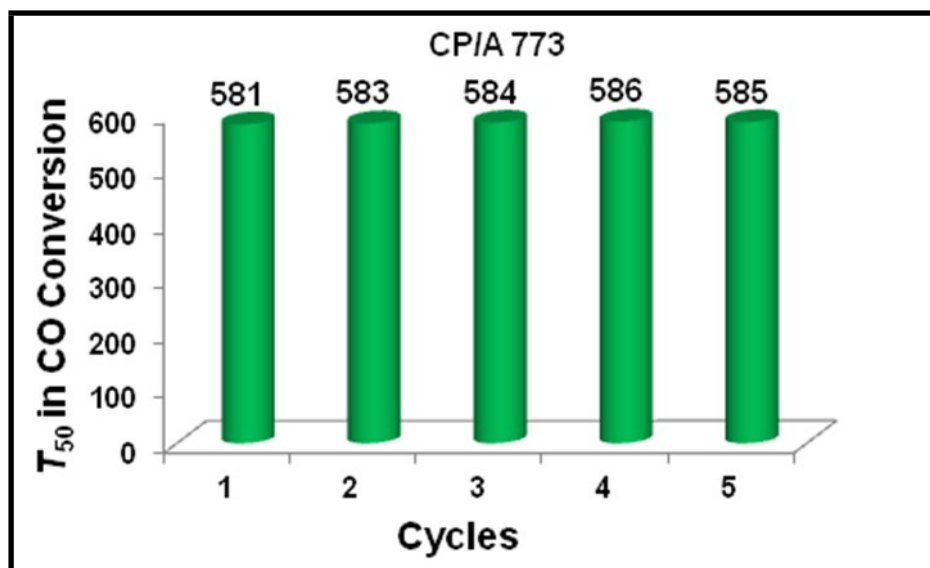

**Fig. S2.** UV Raman spectra of spent CP/A 773 sample

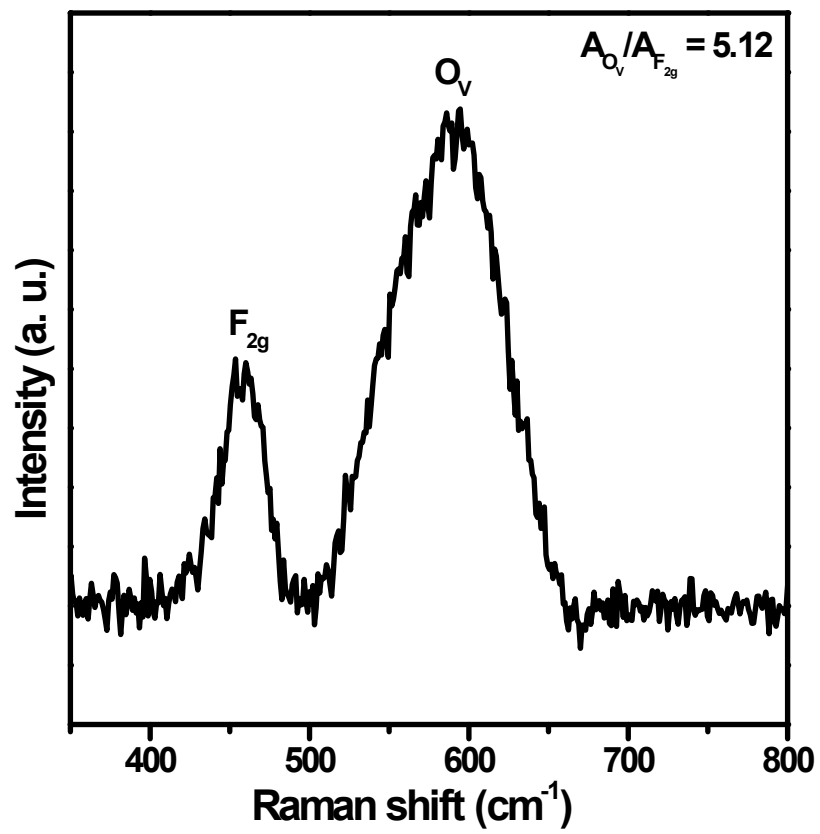

Supplement: c6ra06679h1.pdf [file c6ra06679h1.pdf]
